# Supplementary material for: Structural determinants of TAR RNA-DNA annealing in the absence and presence of HIV-1 nucleocapsid protein
Source: PubMed Central journal article supplement — Nucleic Acids Res. 2011 Jun 30;39(18):8148–62. doi: 10.1093/nar/gkr526 (PMC3185427; doi:10.1093/nar/gkr526), 2011-06-30
Supplement: supp_gkr526_Supplementary_Material.pdf [file supp_gkr526_Supplementary_Material.pdf]

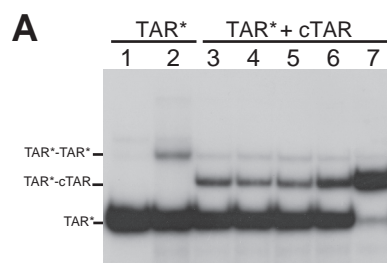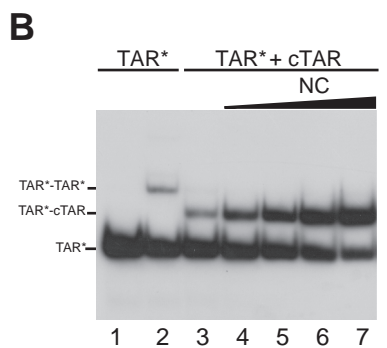

**Supplementary Figure S1.** Annealing of TAR RNA to cTAR DNA in the absence or in the presence of NC. The heat-denatured control of TAR (1 pmol of TAR <sup>32</sup>P-RNA at  $2 \times 10^4$  cpm/pmol in 10  $\mu$ l of double-distilled water) was performed by heating at 90 °C for 2 min and chilling for 2 min on ice, and mixing with 2.5  $\mu$ l of loading buffer (50 % w/v glycerol, 0.05 % w/v bromophenol blue, 0.05 % w/v xylene cyanol). The annealing assays were carried out in a final volume of 10  $\mu$ l. One pmol of TAR <sup>32</sup>P-RNA ( $2 \times 10^4$  cpm/pmol) in 3.6  $\mu$ l of water was heated at 90 °C for 2 min and chilled for 2 min on ice. Then, 0.9  $\mu$ l of strand transfer buffer was added (final concentrations: 75 mM KCl, 7 mM MgCl<sub>2</sub> and 50 mM Tris-HCl pH 7.8) and the sample was incubated at 37 °C for 30 min. Unlabeled DNA (1 pmol) underwent the same renaturation treatment and was then added to refolded TAR <sup>32</sup>P-RNA. The reaction mixture was then incubated at 37 °C for 10 min in the presence of NC at various concentrations or incubated at 37 °C for various times in the absence of protein. At the end of incubations, 3.5  $\mu$ l of loading buffer was added to assays without protein, and the assays with NC were phenol-chloroform extracted and each aqueous phase was mixed with 3.5  $\mu$ l of loading buffer. The samples were analyzed by electrophoresis on a 12 % polyacrylamide gel (37.5:1 (w/w), acrylamide/bisacrylamide) at 25 °C in 1 X TBE buffer (90 mM Tris-borate (pH 8.3), 2 mM EDTA). After electrophoresis, the gel was fixed, dried and autoradiographed. **(A)** Time course of TAR RNA annealing with cTAR DNA in the absence of NC. Lane 1, heat-denatured TAR <sup>32</sup>P-RNA. TAR <sup>32</sup>P-RNA alone (lane 2) or mixed with cTAR DNA (lanes 3-7) was incubated at 37 °C for 10 min (lanes 2 and 3), 1 h (lane 4), 3 h (lane 5), 6 h (lane 6) or 24 h (lane 7). **(B)** TAR RNA-DNA annealing in the presence of NC. Lane 1, heat-denatured TAR <sup>32</sup>P-RNA. Lane 2, TAR <sup>32</sup>P-RNA was incubated in the presence of NC at a protein to nucleotide molar ratio of 1:1. TAR <sup>32</sup>P-RNA mixed with cTAR DNA (lanes 3-7) was incubated in the absence (lane 3) or presence of NC (lanes 4-7). The protein to nucleotide molar ratios were 1:8 (lane 4), 1:4 (lane 5), 1:2 (lane 6) and 1:1 (lane 7). Monomeric form of TAR is indicated by TAR\*. The TAR RNA-cTAR DNA duplex is indicated by TAR\*-cTAR. Homodimeric form of TAR is indicated by TAR\*-TAR\*.
